# Supplementary material for: Microwave assisted conversion of carbohydrates and biopolymers to 5-hydroxymethylfurfural with aluminium chloride catalyst in water
Source: Royal Society of Chemistry journal article supplement (doi:10.1039/c1gc15550d), 2011-01-01

## Supporting Information

# Microwave Assisted Conversion of Carbohydrates and Biopolymers to 5-Hydroxymethylfurfural with Aluminum Chloride Catalyst in Water

Sudipta De, Saikat Dutta, and Basudeb Saha\*

Laboratory of Catalysis, Department of Chemistry, University of Delhi  
North Campus, Delhi-110007, India  
Fax: (+)91-011-2766-7794  
E-mail: bsaha@chemistry.du.ac.in

**Table S1** Optimization of reaction time for dehydration of 30 wt% of fructose catalyzed by AlCl<sub>3</sub> in biphasic water-MIBK (1/4 volume ratio).

| Entry | <i>t</i> (min) | HMF Yield (%) |
|-------|----------------|---------------|
| 1     | 30             | 27.7          |
| 2     | 60             | 32.8          |
| 3     | 75             | 33.3          |
| 4     | 90             | 33.9          |

**Table S2** Results of fructose dehydration to HMF catalyzed by AlCl<sub>3</sub> in different reaction time.

| Entry | Fructose (wt%) | AlCl <sub>3</sub> (mol%) | <i>t</i> (min) | HMF Yield (%) |
|-------|----------------|--------------------------|----------------|---------------|
| 1.    | 5              | 50                       | 0.5            | 47.8          |
| 2.    | 5              | 50                       | 2              | 52.3          |
| 3.    | 5              | 50                       | 5              | 53.9          |
| 4.    | 5              | 50                       | 10             | 54.6          |
| 5.    | 5              | 50                       | 15             | 55.1          |
| 6.    | 5              | 50                       | 20             | 55.7          |

Solvent = water (2 mL), *T* = 120 °C, MW

**Figure S1** Representative  $^1\text{H}$  NMR spectrum of HMF product obtained from dehydration reaction of fructose with  $\text{AlCl}_3$  in water. This spectrum recorded in  $\text{CDCl}_3$  at room temperature for determining HMF yield using mesitylene as an internal standard.

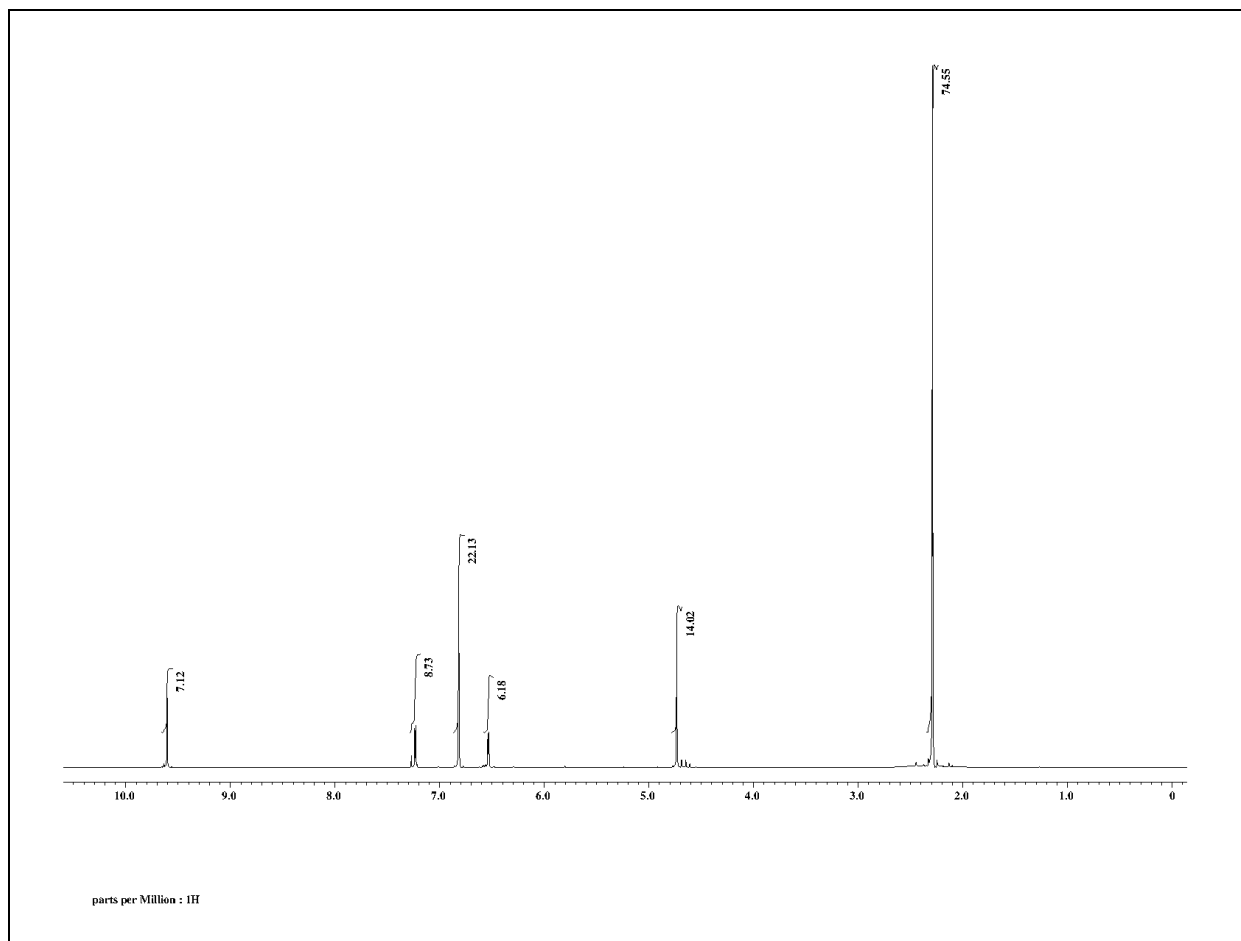

**Figure S2** Representative UV-Vis spectrum of HMF product solution obtained from dehydration reaction of fructose with  $\text{AlCl}_3$  in water.

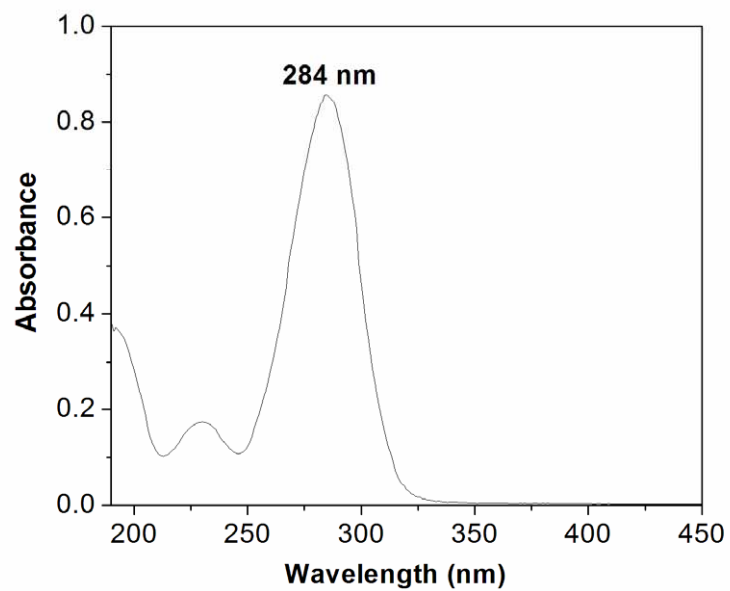

**Figure S3** Representative  $^1\text{H}$  NMR (in  $\text{CDCl}_3$ ) spectrum of the reaction product collected from MIBK phase of fructose (30 wt%) dehydration reaction with 50 mol%  $\text{AlCl}_3$  catalyst in biphasic water-MIBK solvent under microwave heating at  $T = 120\text{ }^\circ\text{C}$  for 5 min.

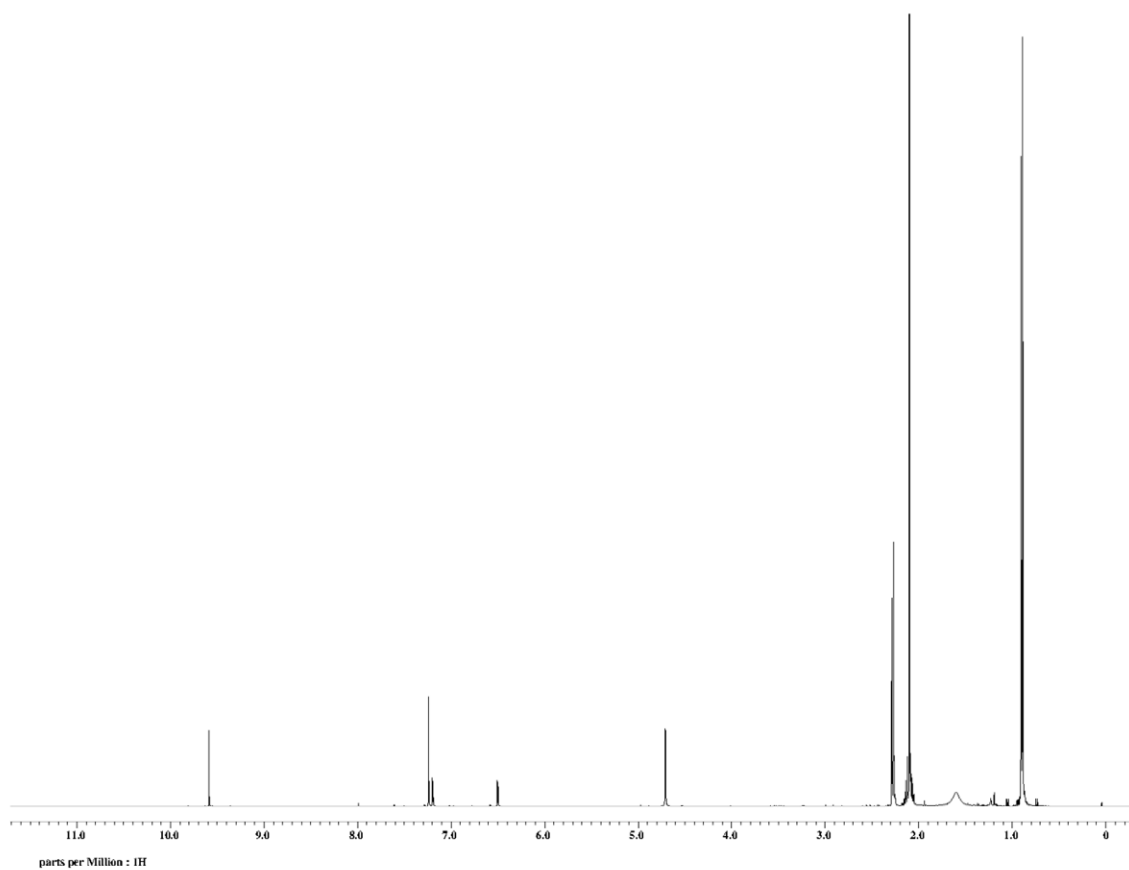

**Figure S4** Representative  $^1\text{H}$  NMR ( $\text{DMSO-}d_6$ ) spectrum of the insoluble brown material obtained in fructose (30 wt%) dehydration with  $\text{AlCl}_3$  in water under microwave heating at  $120^\circ\text{C}$  for 5 min.

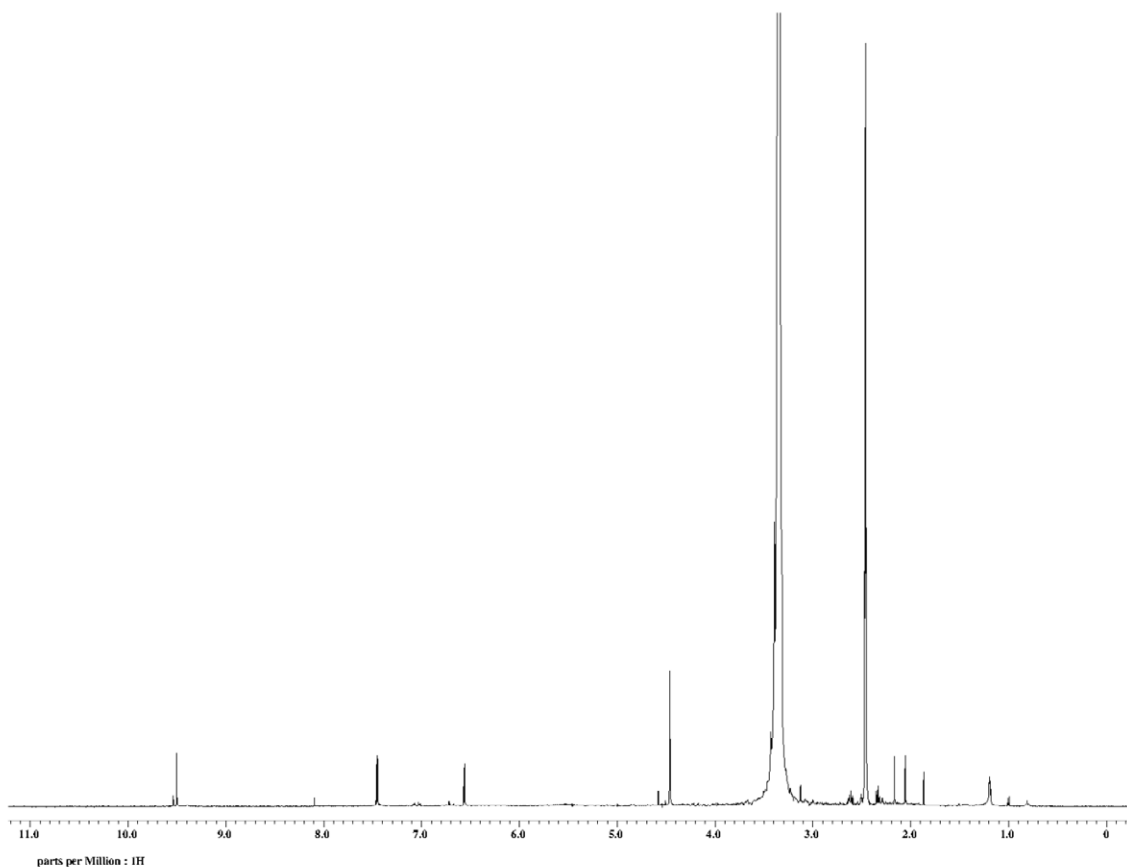

**Figure S5** Representative  $^1\text{H}$  NMR spectrum for a mixture of glucose and  $\text{AlCl}_3$  in  $\text{DMSO-}d_6$  at room temperature to  $100\text{ }^\circ\text{C}$ ; (a)  $^1\text{H}$  NMR spectrum of glucose (25 mg) at room temperature in  $\text{DMSO-}d_6$ . (b)  $^1\text{H}$  NMR spectrum of glucose (25 mg) +  $\text{AlCl}_3$  (9.3 mg) (2:1 molar ratio) at room temperature displaying broad  $\text{H}_{\text{O-H}}$  signals of glucose due to the interaction of Cl of  $\text{AlCl}_3$  with OH of glucose in  $\text{DMSO-}d_6$ . (c)  $^1\text{H}$  NMR spectrum of glucose at  $100\text{ }^\circ\text{C}$  heated for 40 min. (d)  $^1\text{H}$  NMR spectrum of glucose +  $\text{AlCl}_3$  (2:1 molar ratio) at  $100\text{ }^\circ\text{C}$  heated for 40 min. Data presented for  $\delta 4$  to 5 ppm with full spectrum ( $\delta 1$  to 10 ppm) as inset.

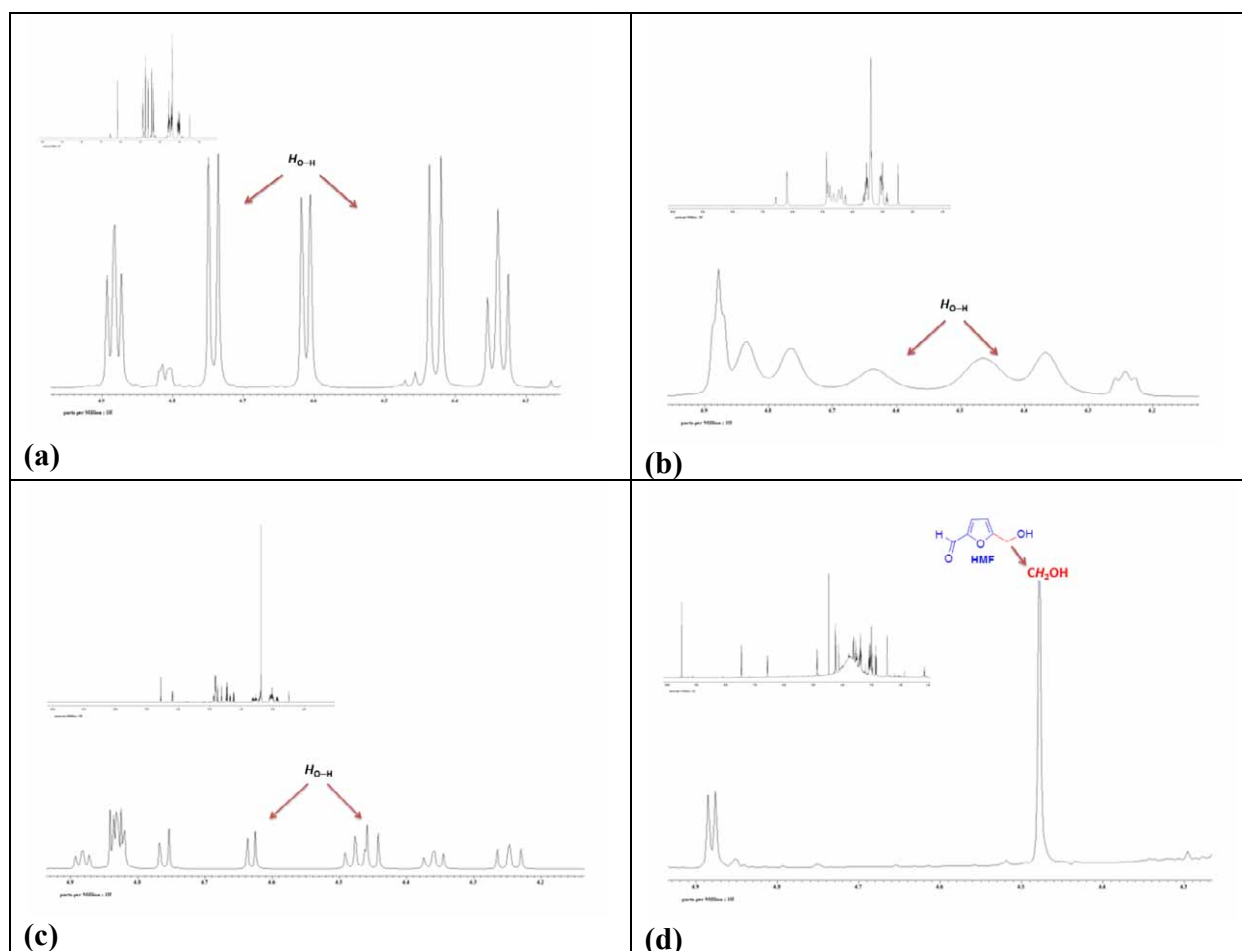

**Figure S6** Representative  $^1\text{H}$  NMR spectrum for a mixture of glucose and  $\text{SnCl}_4$  in  $\text{DMSO-}d_6$  at room temperature to  $120\text{ }^\circ\text{C}$ ; (a)  $^1\text{H}$  NMR spectrum of glucose (25 mg) at room temperature in  $\text{DMSO-}d_6$ . (b)  $^1\text{H}$  NMR spectrum of glucose (25 mg) +  $\text{SnCl}_4$  (9 mg) (4:1 molar ratio) at room temperature displaying disappearance of  $H_{\text{O-H}}$  signals of glucose due to the interaction of  $\text{SnCl}_4$  with OH of glucose in  $\text{DMSO-}d_6$ . (c)  $^1\text{H}$  NMR spectrum of glucose +  $\text{SnCl}_4$  (2:1 molar ratio) at  $80\text{ }^\circ\text{C}$  heated for 40 min. (d)  $^1\text{H}$  NMR spectrum of glucose +  $\text{SnCl}_4$  (2:1 molar ratio) at  $120\text{ }^\circ\text{C}$  heated for 30 min. Full spectrums ( $\delta 0$  to 11 ppm) for each steps presented as inset.

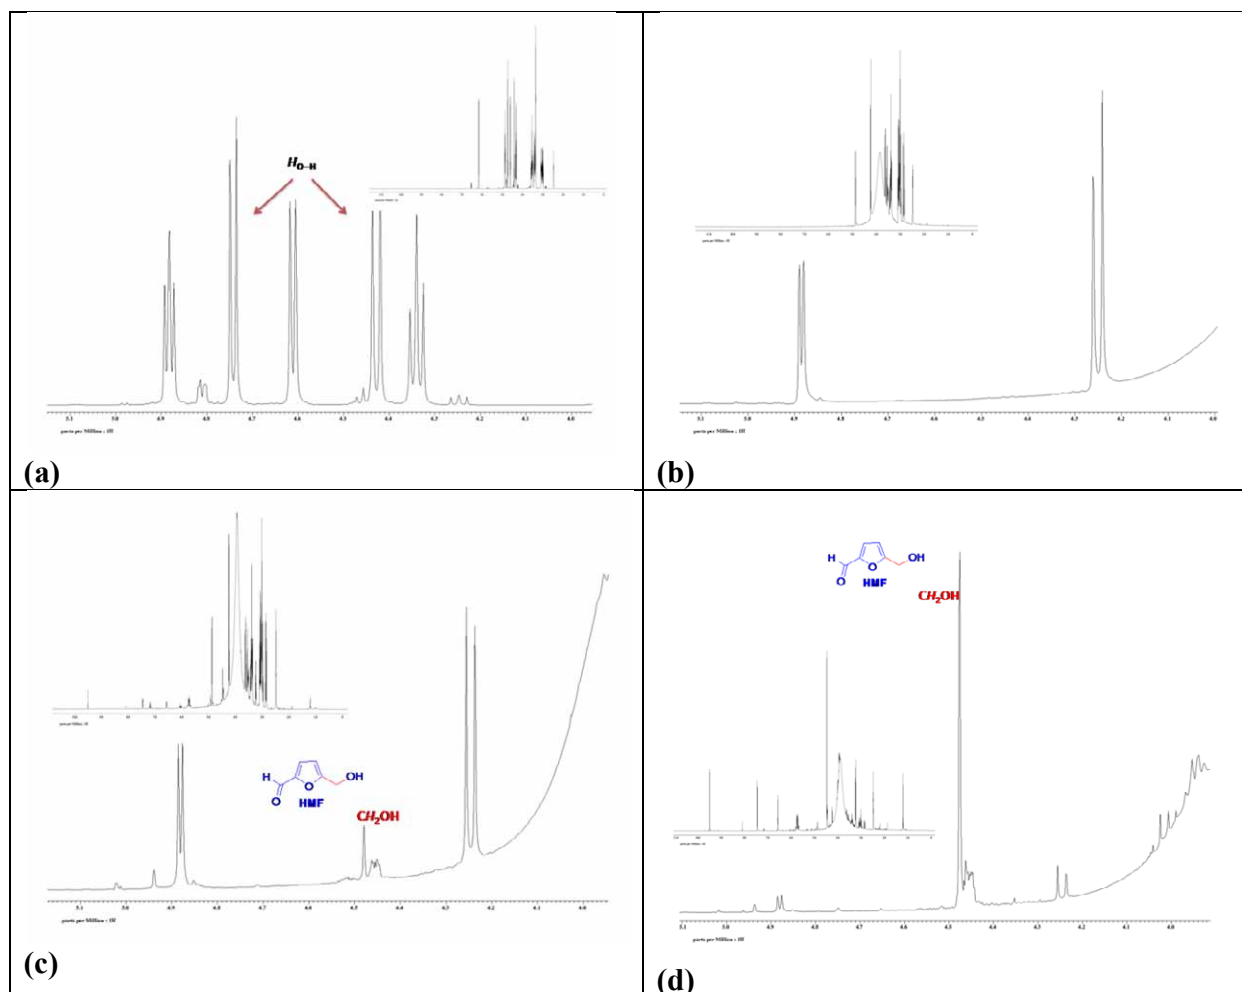

**Figure S7** Representative  $^1\text{H}$  NMR spectrum for a mixture of glucose and  $\text{Yb}(\text{OTf})_3$  in  $\text{DMSO-}d_6$  at room temperature to  $120\text{ }^\circ\text{C}$ ; (a)  $^1\text{H}$  NMR spectrum of glucose (25 mg) at room temperature in  $\text{DMSO-}d_6$ . (b)  $^1\text{H}$  NMR spectrum of glucose (25 mg) +  $\text{Yb}(\text{OTf})_3$  (9.3 mg) (2:1 molar ratio) at  $120\text{ }^\circ\text{C}$  heated for 40 min in  $\text{DMSO-}d_6$ . Full spectrums ( $\delta 0$  to 11 ppm) for each steps presented as inset.

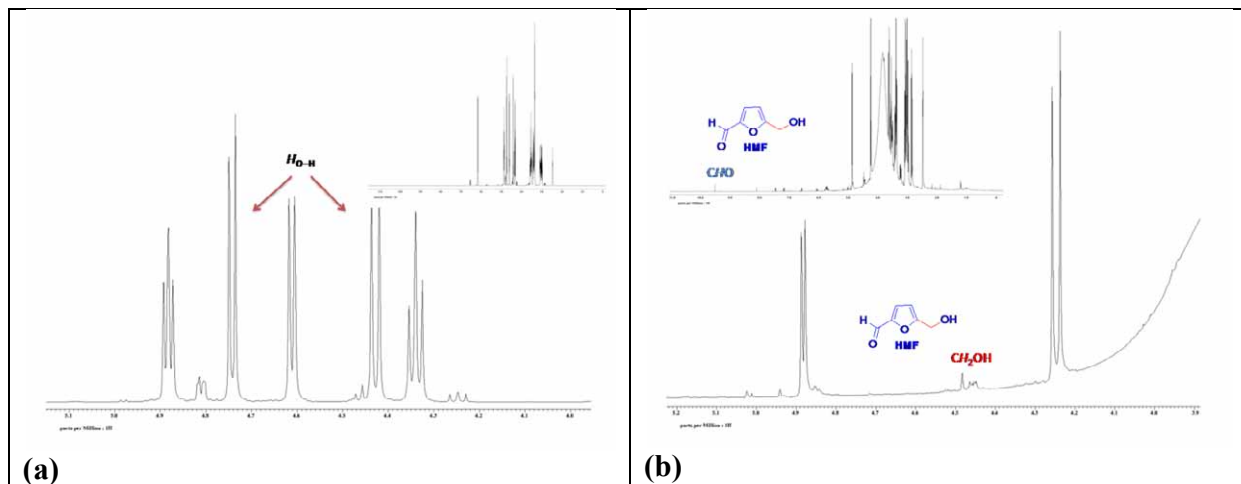

Supplement: c1gc15550d.pdf [file c1gc15550d.pdf]
